# Supplementary material for: The SWEET gene family in Hevea brasiliensis – its evolution and expression compared with four other plant species
Source: PubMed Central journal article supplement (PMC5715295; doi:10.1002/2211-5463.12332), 2017-10-30
Supplement: FEB4-7-1943-s001.pdf [file FEB4-7-1943-s001.pdf]

Supplementary Table S1. SWEET Accessions.

| <i>Hevea brasiliensis</i>      | <i>Manihot esculenta</i>      | <i>Ricinus communis</i>  | <i>Populus trichocarpa</i>    | <i>Arabidopsis thaliana</i> |
|--------------------------------|-------------------------------|--------------------------|-------------------------------|-----------------------------|
| HbSWEET1a-scaffold1368_1746    | MeSWEET1a-cassava4.1_014638m  | ReSWEET1-27985.m000892   | PtSWEET1a-Potri.005G187300.1  | ATSWEET1-AT1G21460.1        |
| HbSWEET1b-scaffold4412_5699    | MeSWEET1b-cassava4.1_014650m  | ReSWEET2-30026.m001515   | PtSWEET1b-Potri.002G072600.1  | ATSWEET2-AT3G14770.1        |
| HbSWEET1c-scaffold2014_38474   | MeSWEET2a-cassava4.1_015227m  | ReSWEET3-30169.m006529   | PtSWEET1c-Potri.002G072800.1  | ATSWEET3-AT5G53190.1        |
| HbSWEET2a-scaffold0633_726258  | MeSWEET2b-cassava4.1_030719m  | ReSWEET4a-29822.m003349  | PtSWEET1d-Potri.002G072700.1  | ATSWEET4-AT3G28007.1        |
| HbSWEET2b-scaffold0291_2393    | MeSWEET3a-cassava4.1_026477m  | ReSWEET4b-27613.m000628  | PtSWEET2a-Potri.001G383400.1  | ATSWEET5-AT5G62850.1        |
| HbSWEET2c-scaffold0649_515754  | MeSWEET3b-cassava4.1_022559m  | ReSWEET4c-29475.m000237  | PtSWEET2b-Potri.001G383000.1  | ATSWEET6-AT1G66770.1        |
| HbSWEET2d-scaffold1397_73855   | MeSWEET4-cassava4.1_016815m   | ReSWEET4d-29822.m003348  | PtSWEET2c-Potri.011G103600.1  | ATSWEET7-AT4G10850.1        |
| HbSWEET2e-scaffold0991_115099  | MeSWEET5-cassava4.1_026390m   | ReSWEET5-30147.m013970   | PtSWEET2d-Potri.001G355500.1  | ATSWEET8-AT5G40260.1        |
| HbSWEET2f-scaffold1207_75820   | MeSWEET6-cassava4.1_014231m   | ReSWEET6-30068.m002528   | PtSWEET3a-Potri.015G021500.1  | ATSWEET9-AT2G39060.1        |
| HbSWEET3a-scaffold0047_2029699 | MeSWEET7-cassava4.1_028141m   | ReSWEET9-29647.m002020   | PtSWEET3b-Potri.012G031400.1  | ATSWEET10-AT5G50790.1       |
| HbSWEET3b-scaffold0802_319652  | MeSWEET9a-cassava4.1_032222m  | ReSWEET10a-30147.m014446 | PtSWEET3c-Potri.015G021900.1  | ATSWEET11-AT3G48740.1       |
| HbSWEET4a-scaffold0250_352964  | MeSWEET9b-cassava4.1_031208m  | ReSWEET10b-30147.m014447 | PtSWEET4-Potri.001G344300.1   | ATSWEET12-AT5G23660.1       |
| HbSWEET4b-scaffold0371_980268  | MeSWEET10a-cassava4.1_013474m | ReSWEET11-30147.m014444  | PtSWEET5-Potri.015G074300.1   | ATSWEET13-AT5G50800.1       |
| HbSWEET4c-scaffold0371_939664  | MeSWEET10b-cassava4.1_015602m | ReSWEET12-30147.m014445  | PtSWEET6-Potri.003G143100.1   | ATSWEET14-AT4G25010.1       |
| HbSWEET5a-scaffold0121_20098   | MeSWEET10c-cassava4.1_021350m | ReSWEET15-29929.m004599  | PtSWEET9-Potri.019G030500.1   | ATSWEET15-AT5G13170.1       |
| HbSWEET5b-scaffold0190_471668  | MeSWEET10d-cassava4.1_013519m | ReSWEET16a-29579.m000197 | PtSWEET10a-Potri.015G101400.1 | ATSWEET16-AT3G16690.1       |
| HbSWEET6-scaffold1545_54737    | MeSWEET10e-cassava4.1_032927m | ReSWEET16b-29726.m004066 | PtSWEET10b-Potri.015G101600.1 | ATSWEET17-AT4G15920.1       |
| HbSWEET7-scaffold1143_36139    | MeSWEET11-cassava4.1_028116m  | ReSWEET17-30128.m008852  | PtSWEET10c-Potri.015G101500.1 |                             |
| HbSWEET9a-scaffold1512_21440   | MeSWEET12a-cassava4.1_017557m |                          | PtSWEET10d-Potri.012G103200.1 |                             |
| HbSWEET9b-scaffold0030_998488  | MeSWEET13-cassava4.1_026944m  |                          | PtSWEET11-Potri.015G101700.1  |                             |
| HbSWEET10a-scaffold1273_165194 | MeSWEET15a-cassava4.1_026251m |                          | PtSWEET15a-Potri.003G166800.1 |                             |
| HbSWEET10b-scaffold0491_348730 | MeSWEET15b-cassava4.1_014124m |                          | PtSWEET15b-Potri.001G060900.1 |                             |
| HbSWEET10c-scaffold1273_149445 | MeSWEET16a-cassava4.1_014996m |                          | PtSWEET16a-Potri.005G023900.1 |                             |
| HbSWEET10d-scaffold0491_383573 | MeSWEET16b-cassava4.1_015143m |                          | PtSWEET16b-Potri.013G014400.1 |                             |
| HbSWEET10e-scaffold0462_183492 | MeSWEET17-cassava4.1_014640m  |                          | PtSWEET16c-Potri.013G014500.1 |                             |
| HbSWEET10f-scaffold0491_387781 | MeSWEET17a-cassava4.1_032999m |                          | PtSWEET16d-Potri.008G220600.1 |                             |
| HbSWEET11-scaffold0807_24959   | MeSWEET17b-cassava4.1_012690m |                          | PtSWEET17a-Potri.013G013800.1 |                             |
| HbSWEET12-scaffold0807_8989    | MeSWEET17c-cassava4.1_014587m |                          | PtSWEET17b-Potri.013G013900.1 |                             |
| HbSWEET15a-scaffold0177_54016  |                               |                          |                               |                             |
| HbSWEET15b-scaffold0868_88200  |                               |                          |                               |                             |
| HbSWEET16a-scaffold1307_48627  |                               |                          |                               |                             |
| HbSWEET16b-scaffold0566_478727 |                               |                          |                               |                             |
| HbSWEET16c-scaffold0625_502257 |                               |                          |                               |                             |
| HbSWEET17a-scaffold0340_202757 |                               |                          |                               |                             |
| HbSWEET17b-scaffold0340_208877 |                               |                          |                               |                             |
| HbSWEET17c-scaffold0878_306703 |                               |                          |                               |                             |
